# Supplementary material for: Agreement between Parkinson Disease Home Diary and Observer Assessments before and after Structured Patient Training
Source: Hindawi journal article supplement (doi:10.1155/2023/8667591), 2023-06-15
Supplement: f1 [file 8667591.f1.zip]

Archive with 2 entries (2 files):
- Supplementary material within the manuscript.doc
- Supporting information - glossary and picture.doc
